# Supplementary material for: Visual Function Score: A New Clinical Tool to Assess Visual Function and Detect Visual Disorders in Children
Source: PubMed Central journal article supplement (PMC9087345; doi:10.3389/fped.2022.868974), 2022-04-26
Supplement: Data_Sheet_1.pdf [file Data_Sheet_1.pdf]

## *Supplementary Material*

### 1 Supplementary Figures and Tables

|            | <b>Diagnosis</b> | <b>Min</b> | <b>Max</b> | <b>Median</b> | <b>Mean</b> | <b>SD</b> | <b>pvalue</b> |
|------------|------------------|------------|------------|---------------|-------------|-----------|---------------|
| <b>TOT</b> | Cerebral VI      | 12.1       | 76.1       | 28.2          | 32.2        | 22.0      | 0.0010        |
|            | Oculo-Motor VI   | 13.0       | 53.5       | 23.7          | 26.8        | 11.3      |               |
|            | Peripheral VI    | 10.6       | 73.9       | 35.9          | 40.3        | 13.9      |               |
| <b>OVA</b> | Cerebral VI      | 9.2        | 71.6       | 37.6          | 36.5        | 19.8      | <0.0001       |
|            | Oculo-Motor VI   | 9.2        | 48.9       | 24.8          | 24.3        | 13.1      |               |
|            | Peripheral VI    | 20.6       | 77.3       | 44.7          | 46.3        | 14.3      |               |
| <b>PVA</b> | Cerebral VI      | 3.9        | 88.5       | 16.3          | 31.8        | 32.1      | 0.0072        |
|            | Oculo-Motor VI   | 3.4        | 74.3       | 13.4          | 24.6        | 24.5      |               |
|            | Peripheral VI    | 6.6        | 89.3       | 34.0          | 37.1        | 18.8      |               |
| <b>OMA</b> | Cerebral VI      | 20.2       | 67.1       | 36.9          | 40.0        | 13.9      | 0.0008        |
|            | Oculo-Motor VI   | 22.6       | 63.6       | 37.5          | 39.6        | 12.1      |               |
|            | Peripheral VI    | 12.9       | 69.4       | 48.7          | 50.0        | 13.8      |               |

**Supplementary Table 1:** Total score and subscores according to first diagnostic criterion. OVA: Ocular-Visual Aspects; PVA: Perceptual Visual Aspects; OMA: Oculo-Motor Aspects; VI: Visual Impairment.

|            | Diagnosis     | Min   | Max  | Median | Mean | SD   | pvalue |
|------------|---------------|-------|------|--------|------|------|--------|
| <b>TOT</b> | Central VI    | 12.1  | 76.1 | 27.5   | 32.4 | 18.6 | 0.0005 |
|            | Peripheral VI | 10.62 | 73.9 | 36.7   | 40.6 | 14.0 |        |
| <b>OVA</b> | Central VI    | 9.2   | 71.6 | 31.9   | 33.0 | 18.1 | 0.0003 |
|            | Peripheral VI | 20.6  | 77.3 | 43.3   | 46.4 | 14.7 |        |
| <b>PVA</b> | Central VI    | 3.4   | 88.5 | 16.0   | 29.2 | 29.2 | 0.0013 |
|            | Peripheral VI | 6.6   | 89.3 | 34.3   | 37.6 | 18.0 |        |
| <b>OMA</b> | Central VI    | 20.2  | 67.1 | 37.3   | 40.6 | 13.4 | 0.0004 |
|            | Peripheral VI | 12.9  | 69.4 | 48.7   | 50.1 | 13.9 |        |

**Supplementary Table 2:** Total score and subscores according to second diagnostic criterion. OVA: Ocular-Visual Aspects; PVA: Perceptual Visual Aspects; OMA: Oculo-Motor Aspects; VI: Visual Impairment.

|            | <b>Diagnosis</b>    | <b>Min</b> | <b>Max</b> | <b>Median</b> | <b>Mean</b> | <b>SD</b> | <b>pvalue</b> |
|------------|---------------------|------------|------------|---------------|-------------|-----------|---------------|
| <b>TOT</b> | hemiplegia          | 12.1       | 40.6       | 22.9          | 23.4        | 11.9      | 0.0002        |
|            | diplegia            | 15.0       | 28.0       | 17.3          | 19.8        | 5.0       |               |
|            | quadriplegia        | 28.3       | 76.1       | 68.5          | 57.3        | 20.6      |               |
|            | cerebellar syndrome | 13.0       | 39.5       | 26.3          | 25.6        | 7.9       |               |
| <b>OVA</b> | hemiplegia          | 9.2        | 60.3       | 14.9          | 27.4        | 21.4      | 0.0004        |
|            | diplegia            | 9.2        | 37.6       | 20.6          | 21.1        | 8.6       |               |
|            | quadriplegia        | 37.6       | 71.6       | 54.6          | 54.0        | 11.2      |               |
|            | cerebellar syndrome | 9.2        | 48.9       | 31.9          | 27.1        | 14.1      |               |
| <b>PVA</b> | hemiplegia          | 3.9        | 41.6       | 11.2          | 15.8        | 15.2      | 0.0002        |
|            | diplegia            | 4.6        | 16.1       | 6.8           | 9.2         | 5.0       |               |
|            | quadriplegia        | 18.7       | 88.5       | 85.4          | 62.9        | 31.5      |               |
|            | cerebellar syndrome | 3.4        | 70.4       | 13.4          | 18.9        | 16.8      |               |
| <b>OMA</b> | hemiplegia          | 20.2       | 40.4       | 36.7          | 31.1        | 9.6       | 0.0015        |
|            | diplegia            | 24.4       | 41.3       | 30.1          | 30.9        | 5.4       |               |
|            | quadriplegia        | 36.7       | 67.1       | 54.0          | 52.4        | 12.0      |               |
|            | cerebellar syndrome | 22.6       | 62.4       | 38.2          | 40.2        | 12.0      |               |

**Supplementary Table 3:** Total score and subscores in relation to neuromotor deficit. OVA: Ocular-Visual Aspects; PVA: Perceptual Visual Aspects; OMA: Oculo-Motor Aspects.

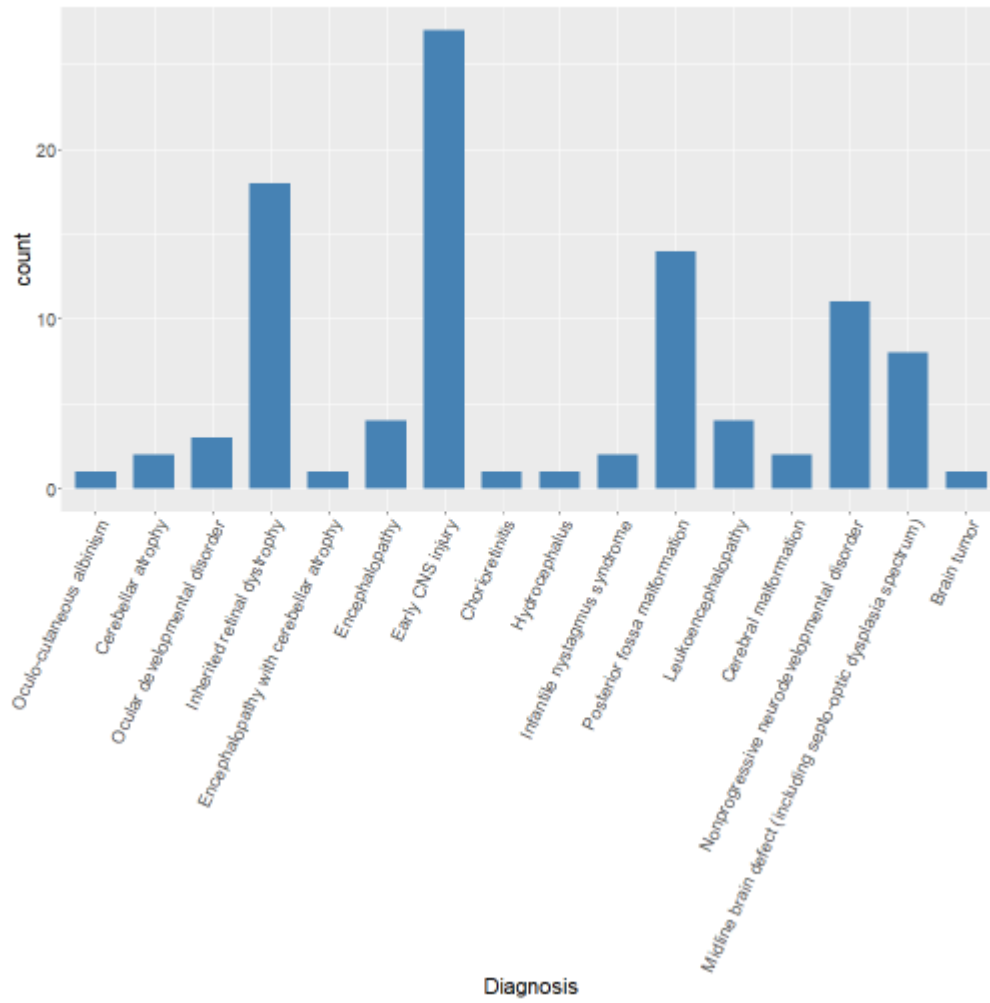

**Supplementary Figure 1.** Diagnosis distribution in the total sample of the study.

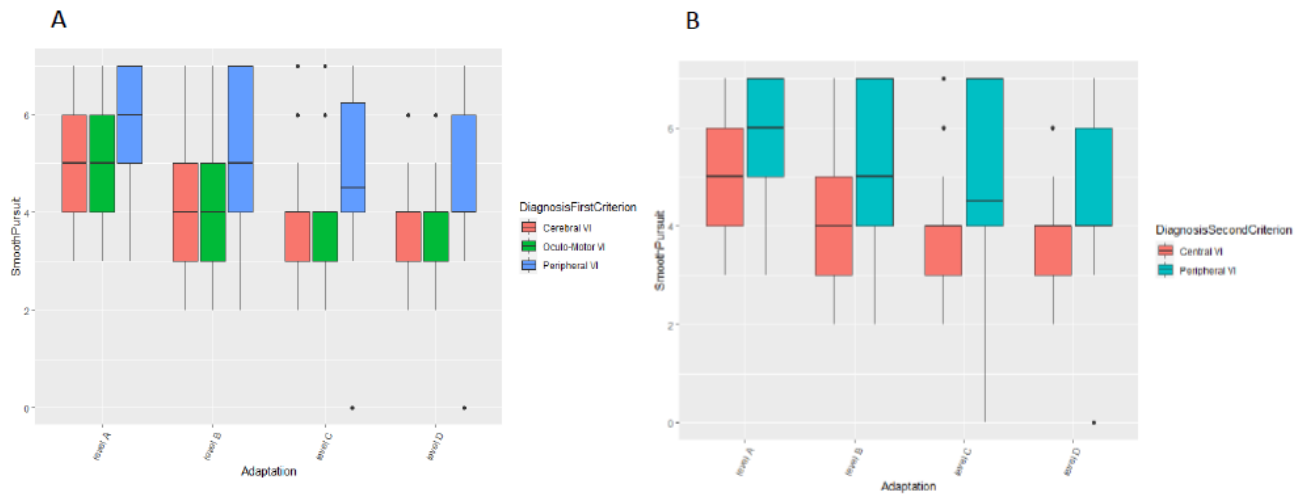

**Supplementary Figure 2:** The role of compensation strategies and environmental adaptations on Smooth Pursuit according to the first (A) and second (B) criterion. VI: Visual Impairment.

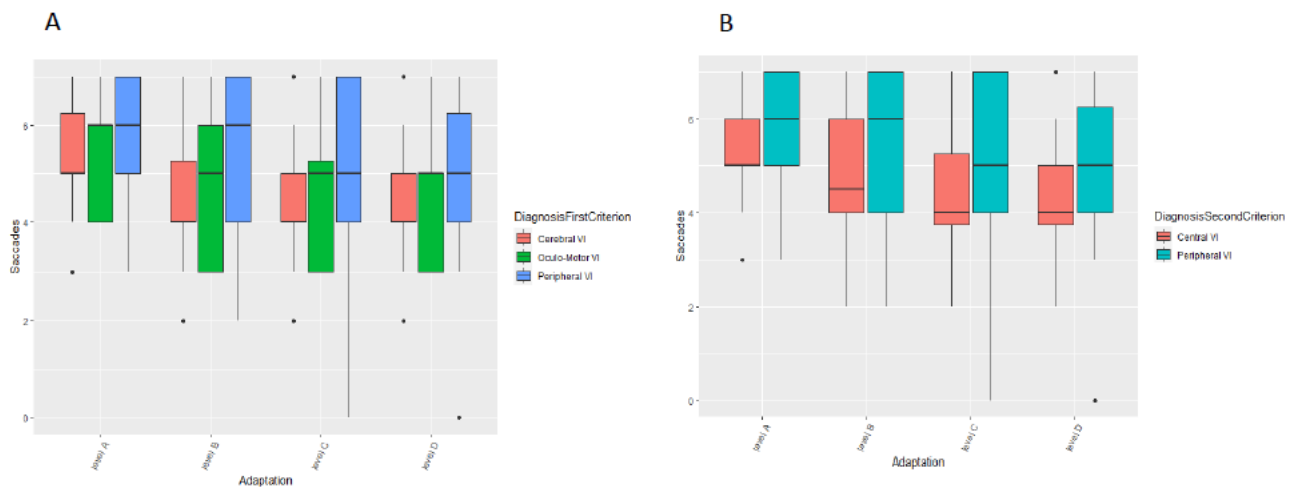

**Supplementary Figure 3:** The role of compensation strategies and environmental adaptations on Saccades according to the first (A) and second (B) criterion. VI: Visual Impairment
