# Supplementary material for: Visual Function Score: A New Clinical Tool to Assess Visual Function and Detect Visual Disorders in Children
Source: PubMed Central journal article supplement (PMC9087345; doi:10.3389/fped.2022.868974), 2022-04-26
Supplement: Data_Sheet_2.pdf [file Data_Sheet_2.pdf]

## VISUAL FUNCTION SCORE – VFS

The administration must be carried out in a setting of adequate collaboration and behavioral regulation, taking into account the age of the child, the general clinical picture and the attention span. Sections 2, 3 and 4 represent the core component of the VFS; section 1 (“Demographic and clinical details”), although not included within the final score, provides a better understanding of the results highlighting interactions between vision and general clinical picture.

### SECTION 1 DEMOGRAPHIC AND CLINICAL DETAILS

|                                       |  |
|---------------------------------------|--|
| <b>Name and Surname</b>               |  |
| <b>Date of birth</b>                  |  |
| <b>Gender</b>                         |  |
| <b>Date of assessment</b>             |  |
| <b>Age of assessment</b>              |  |
| <b>Main diagnosis</b>                 |  |
| <b>Neurophthalmological diagnosis</b> |  |

|                                     |                                                                                                                                                                                                                                                                                                                                                                                                                         |
|-------------------------------------|-------------------------------------------------------------------------------------------------------------------------------------------------------------------------------------------------------------------------------------------------------------------------------------------------------------------------------------------------------------------------------------------------------------------------|
| <b>Neuromotor disorder</b>          | <ul style="list-style-type: none"> <li>0. absent</li> <li>1. dyspraxia / motor coordination impairment or aspecific features such as hypotonia</li> <li>2. hemiplegia</li> <li>3. diplegia</li> <li>4. quadriplegia</li> <li>5. pyramidal syndrome (not CP)</li> <li>6. cerebellar syndrome</li> <li>7. extrapyramidal syndrome</li> <li>8. progressive disorder</li> <li>9. not defined neuromotor disorder</li> </ul> |
| <b>Psychomotor delay (&lt;5 yo)</b> | <ul style="list-style-type: none"> <li>0. absent</li> <li>1. present</li> </ul>                                                                                                                                                                                                                                                                                                                                         |
| <b>Intellectual disability</b>      | <ul style="list-style-type: none"> <li>0. absent</li> <li>1. mild</li> <li>2. moderate</li> <li>3. severe</li> <li>4. unspecified but present</li> <li>5. not testable (for age, collaboration, etc)</li> </ul>                                                                                                                                                                                                         |
| <b>Epilepsy</b>                     | <ul style="list-style-type: none"> <li>0. absent</li> <li>1. EEG abnormalities</li> <li>2. present (drug-responsive)</li> <li>3. present (drug-resistant)</li> </ul>                                                                                                                                                                                                                                                    |
| <b>Posture (preferential)</b>       | <ul style="list-style-type: none"> <li>0. indifferent</li> <li>1. conditioned by neuromotor disorder (no aid necessary)</li> </ul>                                                                                                                                                                                                                                                                                      |

|                                 |                                                                                                                                                                                                                                                                                                                                                                                                                                           |
|---------------------------------|-------------------------------------------------------------------------------------------------------------------------------------------------------------------------------------------------------------------------------------------------------------------------------------------------------------------------------------------------------------------------------------------------------------------------------------------|
|                                 | 2. aid necessary                                                                                                                                                                                                                                                                                                                                                                                                                          |
| <b>Corrective lenses</b>        | <ul style="list-style-type: none"> <li>0. not necessary (emmetropia)</li> <li>1. necessary</li> <li>2. necessary, but no compliance</li> <li>3. not prescribed for the severe of visual picture</li> <li>4. refraction not testable</li> </ul>                                                                                                                                                                                            |
| <b>Visual Evoked Potentials</b> | <ul style="list-style-type: none"> <li>0. Normal</li> <li>1. Mild alteration (one eye)</li> <li>2. Mild alteration (both eyes)</li> <li>3. Moderate to severe alteration (one eye)</li> <li>4. Moderate to severe alteration (both eyes)</li> <li>5. Estinguished (one eye)</li> <li>6. Estinguished (both eyes)</li> <li>7. Not testable due to lack of cooperation or a too severe clinical picture</li> <li>8. Missing data</li> </ul> |
| <b>Electroretinogram</b>        | <ul style="list-style-type: none"> <li>0. Normal</li> <li>1. Mild alteration (one eye)</li> <li>2. Mild alteration (both eyes)</li> <li>3. Moderate to severe alteration (one eye)</li> <li>4. Moderate to severe alteration (both eyes)</li> <li>5. Estinguished (one eye)</li> <li>6. Estinguished (both eyes)</li> <li>7. Not testable due to lack of cooperation or a too severe clinical picture</li> <li>8. Missing data</li> </ul> |

**SECTION 2 OCULAR-VISUAL ASPECTS****Refraction**

|                                                                          |    |  |
|--------------------------------------------------------------------------|----|--|
| Emmetropia                                                               | 1  |  |
| Low (1-3 diopters) refractive error (one eye)                            | 2  |  |
| Low (1-3 diopters) refractive error (both eyes)                          | 3  |  |
| Moderate (4-6 diopters) refractive error (one eye)                       | 4  |  |
| Moderate (4-6 diopters) refractive error (both eyes)                     | 5  |  |
| High (>6 diopters) refractive error (one eye)                            | 6  |  |
| High (>6 diopters) refractive error (both eyes)                          | 7  |  |
| Not testable due to lack of cooperation or a too severe clinical picture | 9  |  |
| Missing data                                                             | 99 |  |

**Fundus oculi**

|                                                                                      |    |  |
|--------------------------------------------------------------------------------------|----|--|
| Normal                                                                               | 1  |  |
| Mild alteration of optic nerve head/retinal vessels/retina (one eye)                 | 2  |  |
| Mild alteration of optic nerve head/retinal vessels/retina (both eyes)               | 3  |  |
| Moderate to severe non-progressive alteration of optic nerve head/retina (one eye)   | 4  |  |
| Moderate to severe non-progressive alteration of optic nerve head/retina (both eyes) | 5  |  |
| Moderate to severe progressive alteration of optic nerve head/retina (one eye)       | 6  |  |
| Moderate to severe progressive alteration of optic nerve head/retina (both eyes)     | 7  |  |
| Not testable due to lack of cooperation or a too severe clinical picture             | 9  |  |
| Missing data                                                                         | 99 |  |

**Anterior Segment**

|                                                                          |    |  |
|--------------------------------------------------------------------------|----|--|
| Normal                                                                   | 1  |  |
| Altered (one eye)                                                        | 2  |  |
| Altered (both eyes)                                                      | 3  |  |
| Not testable due to lack of cooperation or a too severe clinical picture | 9  |  |
| Missing data                                                             | 99 |  |

SECTION 3 PERCEPTUAL-VISUAL ASPECTS

Visual acuity (VA)

|                                     |                               |                            |                                                                                        |    |  |
|-------------------------------------|-------------------------------|----------------------------|----------------------------------------------------------------------------------------|----|--|
| Distance Visual Acuity (3-5 meters) | Multiple Symbols (Line Tests) | No compensatory strategies | Not testable for age (<4yo)                                                            | 00 |  |
|                                     |                               |                            | Normal (>7/10) (in this case sign as 'not necessary'* the next levels for distance VA) | 1  |  |
|                                     |                               |                            | Near-normal (>3 and ≤7/10)                                                             | 2  |  |
|                                     |                               |                            | Mild low vision (> 2 and ≤3/10)                                                        | 3  |  |
|                                     |                               |                            | Moderate low vision (> 1 and ≤2/10)                                                    | 4  |  |
|                                     |                               |                            | Severe low vision (> 0.05 and ≤1/10)                                                   | 5  |  |
|                                     |                               |                            | Partial blindness (≤0.05/10)                                                           | 6  |  |
|                                     |                               |                            | Total blindness                                                                        | 7  |  |
|                                     |                               |                            | Not testable due to lack of cooperation or a too severe clinical picture               | 9  |  |
|                                     |                               |                            | Missing data                                                                           | 99 |  |
|                                     |                               | Compensatory strategies    | Not necessary*                                                                         | 0  |  |
|                                     |                               |                            | Not testable for age (<4yo)                                                            | 00 |  |
|                                     |                               |                            | Normal (>7/10) (in this case sign as 'not necessary'* the next levels for distance VA) | 1  |  |
|                                     |                               |                            | Near-normal (>3 and ≤7/10)                                                             | 2  |  |
|                                     |                               |                            | Mild low vision (> 2 and ≤3/10)                                                        | 3  |  |
|                                     |                               |                            | Moderate low vision (> 1 and ≤2/10)                                                    | 4  |  |
|                                     |                               |                            | Severe low vision (> 0.05 and ≤1/10)                                                   | 5  |  |
|                                     |                               |                            | Partial blindness (≤0.05/10)                                                           | 6  |  |
|                                     |                               |                            | Total blindness                                                                        | 7  |  |
|                                     |                               |                            | Not testable due to lack of cooperation or a too severe clinical picture               | 9  |  |
| Missing data                        | 99                            |                            |                                                                                        |    |  |

|                                                 |                         |                                                                          |                                                                                        |    |  |
|-------------------------------------------------|-------------------------|--------------------------------------------------------------------------|----------------------------------------------------------------------------------------|----|--|
| Distance<br>Visual<br>Acuity<br>(3-5<br>meters) | Single<br>Symbols Test  | No compensatory<br>strategies                                            | Not necessary*                                                                         | 0  |  |
|                                                 |                         |                                                                          | Not testable for age (<4yo)                                                            | 00 |  |
|                                                 |                         |                                                                          | Normal (>7/10) (in this case sign as 'not necessary'* the next levels for distance VA) | 1  |  |
|                                                 |                         |                                                                          | Near-normal (>3 and ≤7/10)                                                             | 2  |  |
|                                                 |                         |                                                                          | Mild low vision (> 2 and ≤3/10)                                                        | 3  |  |
|                                                 |                         |                                                                          | Moderate low vision (> 1 and ≤2/10)                                                    | 4  |  |
|                                                 |                         |                                                                          | Severe low vision (> 0.05 and ≤1/10)                                                   | 5  |  |
|                                                 |                         |                                                                          | Partial blindness (≤0.05/10)                                                           | 6  |  |
|                                                 |                         |                                                                          | Total blindness                                                                        | 7  |  |
|                                                 |                         |                                                                          | Not testable due to lack of cooperation or a too severe clinical picture               | 9  |  |
|                                                 |                         |                                                                          | Missing data                                                                           | 99 |  |
|                                                 | Compensatory strategies | Not necessary*                                                           | 0                                                                                      |    |  |
|                                                 |                         | Not testable for age (<4yo)                                              | 00                                                                                     |    |  |
|                                                 |                         | Normal (>7/10)                                                           | 1                                                                                      |    |  |
|                                                 |                         | Near-normal (>3 and ≤7/10)                                               | 2                                                                                      |    |  |
|                                                 |                         | Mild low vision (> 2 and ≤3/10)                                          | 3                                                                                      |    |  |
|                                                 |                         | Moderate low vision (> 1 and ≤2/10)                                      | 4                                                                                      |    |  |
|                                                 |                         | Severe low vision (> 0.05 and ≤1/10)                                     | 5                                                                                      |    |  |
|                                                 |                         | Partial blindness (≤0.05/10)                                             | 6                                                                                      |    |  |
|                                                 |                         | Total blindness                                                          | 7                                                                                      |    |  |
|                                                 |                         | Not testable due to lack of cooperation or a too severe clinical picture | 9                                                                                      |    |  |
|                                                 |                         | Missing data                                                             | 99                                                                                     |    |  |

|                          |                                     |                               |                                                                                    |    |  |
|--------------------------|-------------------------------------|-------------------------------|------------------------------------------------------------------------------------|----|--|
| Near<br>Visual<br>Acuity | Multiple<br>Symbols<br>(Line Tests) | No compensatory<br>strategies | Not testable for age (<2.5yo)                                                      | 00 |  |
|                          |                                     |                               | Normal (>7/10) (in this case sign as 'not necessary'* the next levels for near VA) | 1  |  |
|                          |                                     |                               | Near-normal (>3 and ≤7/10)                                                         | 2  |  |

|  |  |                         |                                                                                         |    |  |
|--|--|-------------------------|-----------------------------------------------------------------------------------------|----|--|
|  |  |                         | Mild low vision ( $> 2$ and $\leq 3/10$ )                                               | 3  |  |
|  |  |                         | Moderate low vision ( $> 1$ and $\leq 2/10$ )                                           | 4  |  |
|  |  |                         | Severe low vision ( $> 0.05$ and $\leq 1/10$ )                                          | 5  |  |
|  |  |                         | Partial blindness ( $\leq 0.05/10$ )                                                    | 6  |  |
|  |  |                         | Total blindness                                                                         | 7  |  |
|  |  |                         | Not testable due to lack of cooperation or a too severe clinical picture                | 9  |  |
|  |  |                         | Missing data                                                                            | 99 |  |
|  |  | Compensatory strategies | Not necessary*                                                                          | 0  |  |
|  |  |                         | Not testable for age ( $< 2.5$ yo)                                                      | 00 |  |
|  |  |                         | Normal ( $> 7/10$ ) (in this case sign as 'not necessary'* the next levels for near VA) | 1  |  |
|  |  |                         | Near-normal ( $> 3$ and $\leq 7/10$ )                                                   | 2  |  |
|  |  |                         | Mild low vision ( $> 2$ and $\leq 3/10$ )                                               | 3  |  |
|  |  |                         | Moderate low vision ( $> 1$ and $\leq 2/10$ )                                           | 4  |  |
|  |  |                         | Severe low vision ( $> 0.05$ and $\leq 1/10$ )                                          | 5  |  |
|  |  |                         | Partial blindness ( $\leq 0.05/10$ )                                                    | 6  |  |
|  |  |                         | Total blindness                                                                         | 7  |  |
|  |  |                         | Not testable due to lack of cooperation or a too severe clinical picture                | 9  |  |
|  |  |                         | Missing data                                                                            | 99 |  |

|                    |                     |                            |                                                                                         |    |  |
|--------------------|---------------------|----------------------------|-----------------------------------------------------------------------------------------|----|--|
| Near Visual Acuity | Single Symbols Test | No compensatory strategies | Not necessary*                                                                          | 0  |  |
|                    |                     |                            | Not testable for age ( $< 2.5$ yo)                                                      | 00 |  |
|                    |                     |                            | Normal ( $> 7/10$ ) (in this case sign as 'not necessary'* the next levels for near VA) | 1  |  |
|                    |                     |                            | Near-normal ( $> 3$ and $\leq 7/10$ )                                                   | 2  |  |
|                    |                     |                            | Mild low vision ( $> 2$ and $\leq 3/10$ )                                               | 3  |  |
|                    |                     |                            | Moderate low vision ( $> 1$ and $\leq 2/10$ )                                           | 4  |  |
|                    |                     |                            | Severe low vision ( $> 0.05$ and $\leq 1/10$ )                                          | 5  |  |
|                    |                     |                            | Partial blindness ( $\leq 0.05/10$ )                                                    | 6  |  |
|                    |                     |                            | Total blindness                                                                         | 7  |  |

|  |  |                         |                                                                                    |    |  |
|--|--|-------------------------|------------------------------------------------------------------------------------|----|--|
|  |  |                         | Not testable due to lack of cooperation or a too severe clinical picture           | 9  |  |
|  |  |                         | Missing data                                                                       | 99 |  |
|  |  | Compensatory strategies | Not necessary*                                                                     | 0  |  |
|  |  |                         | Not testable for age (<2.5yo)                                                      | 00 |  |
|  |  |                         | Normal (>7/10) (in this case sign as 'not necessary'* the next levels for near VA) | 1  |  |
|  |  |                         | Near-normal (>3 and ≤7/10)                                                         | 2  |  |
|  |  |                         | Mild low vision (> 2 and ≤3/10)                                                    | 3  |  |
|  |  |                         | Moderate low vision (> 1 and ≤2/10)                                                | 4  |  |
|  |  |                         | Severe low vision (> 0.05 and ≤1/10)                                               | 5  |  |
|  |  |                         | Partial blindness (≤0.05/10)                                                       | 6  |  |
|  |  |                         | Total blindness                                                                    | 7  |  |
|  |  |                         | Not testable due to lack of cooperation or a too severe clinical picture           | 9  |  |
|  |  |                         | Missing data                                                                       | 99 |  |

|                |                                                                          |    |  |
|----------------|--------------------------------------------------------------------------|----|--|
| Grating Acuity | Not necessary (if recognition VA is measurable)                          | 0  |  |
|                | Normal                                                                   | 1  |  |
|                | Reduced (standard distance for age)                                      | 2  |  |
|                | Reduced (only testable for lower distances compared to standard age)     | 3  |  |
|                | Low vision card perception only/only response to the 0.50 cyc/deg paddle | 4  |  |
|                | No response                                                              | 5  |  |
|                | Not testable due to lack of cooperation or a too severe clinical picture | 9  |  |
|                | Missing data                                                             | 99 |  |

### Visual Acuity Symmetry

|                        |                                                                          |    |  |
|------------------------|--------------------------------------------------------------------------|----|--|
| Distance Visual Acuity | Not testable for age (<4yo)                                              | 00 |  |
|                        | Symmetric (multiple symbols/Line Tests)                                  | 1  |  |
|                        | Symmetric (single symbols test)                                          | 2  |  |
|                        | Not symmetric (difference > 1.5/10)                                      | 3  |  |
|                        | Not testable due to lack of cooperation or a too severe clinical picture | 9  |  |
|                        | Missing data                                                             | 99 |  |
| Near Visual Acuity     | Not testable for age (<2.5yo)                                            | 00 |  |

|                |                                                                          |    |  |
|----------------|--------------------------------------------------------------------------|----|--|
|                | Symmetric (multiple symbols/Line Tests)                                  | 1  |  |
|                | Symmetric (single symbols test)                                          | 2  |  |
|                | Not symmetric (difference > 1.5/10)                                      | 3  |  |
|                | Not testable due to lack of cooperation or a too severe clinical picture | 9  |  |
|                | Missing data                                                             | 99 |  |
| Grating Acuity | Not necessary                                                            | 0  |  |
|                | Symmetric                                                                | 1  |  |
|                | Not symmetric (difference > 2 cards or 2 paddles)                        | 2  |  |
|                | Not testable due to lack of cooperation or a too severe clinical picture | 9  |  |
|                | Missing data                                                             | 99 |  |

### Contrast sensitivity (CS)

|                                            |                               |                                                                                |                                                                                |    |  |
|--------------------------------------------|-------------------------------|--------------------------------------------------------------------------------|--------------------------------------------------------------------------------|----|--|
| Distance Contrast sensitivity (3-5 meters) | Multiple Symbols (Line Tests) | No compensatory strategies                                                     | Not testable for age (<4yo)                                                    | 00 |  |
|                                            |                               |                                                                                | Normal (in this case sign as 'not necessary'* the next levels for distance CS) | 1  |  |
|                                            |                               |                                                                                | Mild alteration                                                                | 2  |  |
|                                            |                               |                                                                                | Moderate alteration                                                            | 3  |  |
|                                            |                               |                                                                                | Severe alteration                                                              | 4  |  |
|                                            |                               |                                                                                | No response                                                                    | 5  |  |
|                                            |                               |                                                                                | Not testable due to lack of cooperation or a too severe clinical picture       | 9  |  |
|                                            |                               |                                                                                | Missing data                                                                   | 99 |  |
|                                            | Compensatory strategies       | Not necessary*                                                                 | 0                                                                              |    |  |
|                                            |                               | Not testable for age (<4yo)                                                    | 00                                                                             |    |  |
|                                            |                               | Normal (in this case sign as 'not necessary'* the next levels for distance CS) | 1                                                                              |    |  |
|                                            |                               | Mild alteration                                                                | 2                                                                              |    |  |
|                                            |                               | Moderate alteration                                                            | 3                                                                              |    |  |
|                                            |                               | Severe alteration                                                              | 4                                                                              |    |  |
|                                            |                               | No response                                                                    | 5                                                                              |    |  |
|                                            |                               | Not testable due to lack of cooperation or a too severe clinical picture       | 9                                                                              |    |  |
| Missing data                               | 99                            |                                                                                |                                                                                |    |  |



|                                            |                         |                                                                          |                                                                                |    |  |
|--------------------------------------------|-------------------------|--------------------------------------------------------------------------|--------------------------------------------------------------------------------|----|--|
| Distance Contrast sensitivity (3-5 meters) | Single Symbols Test     | No compensatory strategies                                               | Not necessary*                                                                 | 0  |  |
|                                            |                         |                                                                          | Not testable for age (<4yo)                                                    | 00 |  |
|                                            |                         |                                                                          | Normal (in this case sign as 'not necessary'* the next levels for distance CS) | 1  |  |
|                                            |                         |                                                                          | Mild alteration                                                                | 2  |  |
|                                            |                         |                                                                          | Moderate alteration                                                            | 3  |  |
|                                            |                         |                                                                          | Severe alteration                                                              | 4  |  |
|                                            |                         |                                                                          | No response                                                                    | 5  |  |
|                                            |                         |                                                                          | Not testable due to lack of cooperation or a too severe clinical picture       | 9  |  |
|                                            |                         |                                                                          | Missing data                                                                   | 99 |  |
|                                            | Compensatory strategies | Not necessary*                                                           | 0                                                                              |    |  |
|                                            |                         | Not testable for age (<4yo)                                              | 00                                                                             |    |  |
|                                            |                         | Normal                                                                   | 1                                                                              |    |  |
|                                            |                         | Mild alteration                                                          | 2                                                                              |    |  |
|                                            |                         | Moderate alteration                                                      | 3                                                                              |    |  |
|                                            |                         | Severe alteration                                                        | 4                                                                              |    |  |
|                                            |                         | No response                                                              | 5                                                                              |    |  |
|                                            |                         | Not testable due to lack of cooperation or a too severe clinical picture | 9                                                                              |    |  |
|                                            |                         | Missing data                                                             | 99                                                                             |    |  |

|                           |                               |                            |                                                                            |    |  |
|---------------------------|-------------------------------|----------------------------|----------------------------------------------------------------------------|----|--|
| Near Contrast sensitivity | Multiple Symbols (Line Tests) | No compensatory strategies | Not testable for age (<2.5yo)                                              | 00 |  |
|                           |                               |                            | Normal (in this case sign as 'not necessary'* the next levels for near CS) | 1  |  |
|                           |                               |                            | Mild alteration                                                            | 2  |  |
|                           |                               |                            | Moderate alteration                                                        | 3  |  |
|                           |                               |                            | Severe alteration                                                          | 4  |  |
|                           |                               |                            | No response                                                                | 5  |  |
|                           |                               |                            | Not testable due to lack of cooperation or a too severe clinical picture   | 9  |  |

|  |  |                         |                                                                            |    |  |
|--|--|-------------------------|----------------------------------------------------------------------------|----|--|
|  |  | Compensatory strategies | Missing data                                                               | 99 |  |
|  |  |                         | Not necessary*                                                             | 0  |  |
|  |  |                         | Not testable for age (<2.5yo)                                              | 00 |  |
|  |  |                         | Normal (in this case sign as 'not necessary'* the next levels for near CS) | 1  |  |
|  |  |                         | Mild alteration                                                            | 2  |  |
|  |  |                         | Moderate alteration                                                        | 3  |  |
|  |  |                         | Severe alteration                                                          | 4  |  |
|  |  |                         | No response                                                                | 5  |  |
|  |  |                         | Not testable due to lack of cooperation or a too severe clinical picture   | 9  |  |
|  |  |                         | Missing data                                                               | 99 |  |

|                           |                     |                            |                                                                            |    |  |
|---------------------------|---------------------|----------------------------|----------------------------------------------------------------------------|----|--|
| Near Contrast sensitivity | Single Symbols Test | No compensatory strategies | Not necessary*                                                             | 0  |  |
|                           |                     |                            | Not testable for age (<2.5yo)                                              | 00 |  |
|                           |                     |                            | Normal (in this case sign as 'not necessary'* the next levels for near CS) | 1  |  |
|                           |                     |                            | Mild alteration                                                            | 2  |  |
|                           |                     |                            | Moderate alteration                                                        | 3  |  |
|                           |                     |                            | Severe alteration                                                          | 4  |  |
|                           |                     |                            | No response                                                                | 5  |  |
|                           |                     |                            | Not testable due to lack of cooperation or a too severe clinical picture   | 9  |  |
|                           |                     | Missing data               | 99                                                                         |    |  |
|                           |                     | Compensatory strategies    | Not necessary*                                                             | 0  |  |
|                           |                     |                            | Not testable for age (<2.5yo)                                              | 00 |  |
|                           |                     |                            | Normal                                                                     | 1  |  |
|                           |                     |                            | Mild alteration                                                            | 2  |  |
|                           |                     |                            | Moderate alteration                                                        | 3  |  |
|                           |                     |                            | Severe alteration                                                          | 4  |  |
| No response               | 5                   |                            |                                                                            |    |  |

|  |  |  |                                                                          |    |  |
|--|--|--|--------------------------------------------------------------------------|----|--|
|  |  |  | Not testable due to lack of cooperation or a too severe clinical picture | 9  |  |
|  |  |  | Missing data                                                             | 99 |  |

### Detection Test

|                                                                                                |    |  |
|------------------------------------------------------------------------------------------------|----|--|
| Not necessary (if Contrast Sensitivity Line test or Single Symbol Test have been administered) | 0  |  |
| Normal                                                                                         | 1  |  |
| Reduced                                                                                        | 2  |  |
| Response only to full contrast stimulus                                                        | 3  |  |
| No response                                                                                    | 4  |  |
| Not testable due to lack of cooperation or a too severe clinical picture                       | 9  |  |
| Missing data                                                                                   | 99 |  |

### Visual Field

|                                                                          |    |  |
|--------------------------------------------------------------------------|----|--|
| Not testable for age (< 12yo)                                            | 00 |  |
| Normal                                                                   | 1  |  |
| Quadrantopsia/scotoma                                                    | 2  |  |
| Hemianopsia                                                              | 3  |  |
| Diffuse reduction                                                        | 4  |  |
| Not testable due to lack of cooperation or a too severe clinical picture | 9  |  |
| Missing data                                                             | 99 |  |

### Visual Localization Areas

|                                                                          |    |  |
|--------------------------------------------------------------------------|----|--|
| Not necessary (if Visual Field can be studied)                           | 0  |  |
| Normal                                                                   | 1  |  |
| Direction preference (Right/left/up/down)                                | 2  |  |
| Diffuse alteration (with/without compensatory strategies)                | 3  |  |
| Only with environmental adaptation                                       | 4  |  |
| No response                                                              | 5  |  |
| Not testable due to lack of cooperation or a too severe clinical picture | 9  |  |
| Missing data                                                             | 99 |  |

### Behavioural Response to Light

|                                                                          |    |  |
|--------------------------------------------------------------------------|----|--|
| Indifferent                                                              | 1  |  |
| Photophobia                                                              | 2  |  |
| Night blindness                                                          | 3  |  |
| Not testable due to lack of cooperation or a too severe clinical picture | 9  |  |
| Missing data                                                             | 99 |  |

**SECTION 4 – OCULO-MOTOR ASPECTS****Head Postural Behaviour**

|                                                   |    |  |
|---------------------------------------------------|----|--|
| Absent                                            | 1  |  |
| Inconstant/variable                               | 2  |  |
| Mild head tilt/turn/tremor                        | 3  |  |
| Severe head tilt/turn/tremor                      | 4  |  |
| Not testable due to a too severe clinical picture | 5  |  |
| Missing data                                      | 99 |  |

**Eyelids**

|                                                   |    |  |
|---------------------------------------------------|----|--|
| Normal                                            | 1  |  |
| Unilateral mild to moderate ptosis                | 2  |  |
| Bilateral mild to moderate ptosis                 | 3  |  |
| Unilateral severe ptosis (covering the eye pupil) | 4  |  |
| Bilateral severe ptosis (covering the eye pupil)  | 5  |  |
| Not testable due to lack of cooperation           | 9  |  |
| Missing data                                      | 99 |  |

**Pupillary Statics**

|                                                                          |    |  |
|--------------------------------------------------------------------------|----|--|
| Normal                                                                   | 1  |  |
| Altered (one eye)                                                        | 2  |  |
| Altered (oboth eyes)                                                     | 3  |  |
| Not testable due to lack of cooperation or a too severe clinical picture | 9  |  |
| Missing data                                                             | 99 |  |

**Pupillary Dynamics**

|                                                                          |    |  |
|--------------------------------------------------------------------------|----|--|
| Normal                                                                   | 1  |  |
| Mild alteration                                                          | 2  |  |
| Moderate-severe alteration                                               | 3  |  |
| Not testable due to lack of cooperation or a too severe clinical picture | 9  |  |
| Missing data                                                             | 99 |  |

**Ocular Motility**

|                                                                          |    |  |
|--------------------------------------------------------------------------|----|--|
| Normal                                                                   | 1  |  |
| Mild hyperfunction/limitation                                            | 2  |  |
| Moderate-severe hyperfunction/limitation                                 | 3  |  |
| Paralytic limitation                                                     | 4  |  |
| Not testable due to lack of cooperation or a too severe clinical picture | 9  |  |
| Missing data                                                             | 99 |  |

**Visual Axis Alignment**

|                                                  |   |  |
|--------------------------------------------------|---|--|
| Normal                                           | 1 |  |
| Mild misalignment with alternating fixation      | 2 |  |
| Severe misalignment without alternating fixation | 3 |  |

|                                                                          |    |  |
|--------------------------------------------------------------------------|----|--|
| Paralytic misalignment                                                   | 4  |  |
| Not testable due to lack of cooperation or a too severe clinical picture | 9  |  |
| Missing data                                                             | 99 |  |

### Fixation

|                                                                             |                                                                                                            |    |  |
|-----------------------------------------------------------------------------|------------------------------------------------------------------------------------------------------------|----|--|
| No compensatory strategies<br>nor environmental adaptation<br>(LEVEL A)     | Stable, durable, binocular; no difference between near and distance                                        | 1  |  |
|                                                                             | Durable, but not binocular and/or alternating and/or durable but slightly different from near and distance | 2  |  |
|                                                                             | Instable/slightly discontinuous and/or different from near and distance but sufficiently durable           | 3  |  |
|                                                                             | Discontinuous                                                                                              | 4  |  |
|                                                                             | Fluctuating/eccentric                                                                                      | 5  |  |
|                                                                             | Sporadic                                                                                                   | 6  |  |
|                                                                             | Absent                                                                                                     | 7  |  |
|                                                                             | Not testable due to lack of cooperation or a too severe clinical picture                                   | 9  |  |
|                                                                             | Missing data                                                                                               | 99 |  |
| Compensatory strategies<br>without environmental<br>adaptation<br>(LEVEL B) | Not necessary (already tested in the previous level)                                                       | 0  |  |
|                                                                             | Stable, durable, binocular; no difference between near and distance                                        | 1  |  |
|                                                                             | Durable, but not binocular and/or alternating and/or durable but slightly different from near and distance | 2  |  |
|                                                                             | Instable/slightly discontinuous and/or different from near and distance but sufficiently durable           | 3  |  |
|                                                                             | Discontinuous                                                                                              | 4  |  |
|                                                                             | Fluctuating/eccentric                                                                                      | 5  |  |
|                                                                             | Sporadic                                                                                                   | 6  |  |
|                                                                             | Absent                                                                                                     | 7  |  |
|                                                                             | Not testable due to lack of cooperation or a too severe clinical picture                                   | 9  |  |
|                                                                             | Missing data                                                                                               | 99 |  |
| Minor Environmental<br>Adaptation (LEVEL C)                                 | Not necessary (already tested in the previous level)                                                       | 0  |  |
|                                                                             | Stable, durable, binocular; no difference between near and distance                                        | 1  |  |
|                                                                             | Durable, but not binocular and/or alternating and/or durable but slightly different from near and distance | 2  |  |
|                                                                             | Instable/slightly discontinuous and/or different from near and distance but sufficiently durable           | 3  |  |

|                                          |                                                                                                            |    |  |
|------------------------------------------|------------------------------------------------------------------------------------------------------------|----|--|
|                                          | Discontinuous                                                                                              | 4  |  |
|                                          | Fluctuating/eccentric                                                                                      | 5  |  |
|                                          | Sporadic                                                                                                   | 6  |  |
|                                          | Absent                                                                                                     | 7  |  |
|                                          | Not testable due to lack of cooperation or a too severe clinical picture                                   | 9  |  |
|                                          | Missing data                                                                                               | 99 |  |
| Major Environmental Adaptation (LEVEL D) | Not necessary (already tested in the previous level)                                                       | 0  |  |
|                                          | Stable, durable, binocular; no difference between near and distance                                        | 1  |  |
|                                          | Durable, but not binocular and/or alternating and/or durable but slightly different from near and distance | 2  |  |
|                                          | Unstable/slightly discontinuous and/or different from near and distance but sufficiently durable           | 3  |  |
|                                          | Discontinuous                                                                                              | 4  |  |
|                                          | Fluctuating/eccentric                                                                                      | 5  |  |
|                                          | Sporadic                                                                                                   | 6  |  |
|                                          | Absent                                                                                                     | 7  |  |
|                                          | Not testable due to lack of cooperation or a too severe clinical picture                                   | 9  |  |
|                                          | Missing data                                                                                               | 99 |  |

### Smooth Pursuit

|                                                                   |                                                                          |    |  |
|-------------------------------------------------------------------|--------------------------------------------------------------------------|----|--|
| No compensatory strategies nor environmental adaptation (LEVEL A) | Durable, complete and binocular                                          | 1  |  |
|                                                                   | Durable but incomplete/asymmetric/non binocular                          | 2  |  |
|                                                                   | Slightly discontinuous in all or great parts of directions               | 3  |  |
|                                                                   | Discontinuous/jerky/augmented latency                                    | 4  |  |
|                                                                   | Inconstant/eccentric/fragmented (continuous losses of fixation)          | 5  |  |
|                                                                   | Possible only for small arc                                              | 6  |  |
|                                                                   | Absent                                                                   | 7  |  |
|                                                                   | Not testable due to lack of cooperation or a too severe clinical picture | 9  |  |
|                                                                   | Missing data                                                             | 99 |  |
| Compensatory strategies without environmental adaptation          | Not necessary (already tested in the previous level)                     | 0  |  |
|                                                                   | Durable, complete and binocular                                          | 1  |  |

|                                          |                                                                          |    |  |
|------------------------------------------|--------------------------------------------------------------------------|----|--|
| (LEVEL B)                                | Durable but incomplete/asymmetric/non binocular                          | 2  |  |
|                                          | Slightly discontinuous in all or great parts of directions               | 3  |  |
|                                          | Discontinuous/jerky/augmented latency                                    | 4  |  |
|                                          | Inconstant/eccentric/fragmented (continuous losses of fixation)          | 5  |  |
|                                          | Possible only for small arc                                              | 6  |  |
|                                          | Absent                                                                   | 7  |  |
|                                          | Not testable due to lack of cooperation or a too severe clinical picture | 9  |  |
|                                          | Missing data                                                             | 99 |  |
| Minor Environmental Adaptation (LEVEL C) | Not necessary (already tested in the previous level)                     | 0  |  |
|                                          | Durable, complete and binocular                                          | 1  |  |
|                                          | Durable but incomplete/asymmetric/non binocular                          | 2  |  |
|                                          | Slightly discontinuous in all or great parts of directions               | 3  |  |
|                                          | Discontinuous/jerky/augmented latency                                    | 4  |  |
|                                          | Inconstant/eccentric/fragmented (continuous losses of fixation)          | 5  |  |
|                                          | Possible only for small arc                                              | 6  |  |
|                                          | Absent                                                                   | 7  |  |
|                                          | Not testable due to lack of cooperation or a too severe clinical picture | 9  |  |
|                                          | Missing data                                                             | 99 |  |
| Major Environmental Adaptation (LEVEL D) | Not necessary (already tested in the previous level)                     | 0  |  |
|                                          | Durable, complete and binocular                                          | 1  |  |
|                                          | Durable but incomplete/asymmetric/non binocular                          | 2  |  |
|                                          | Slightly discontinuous in all or great parts of directions               | 3  |  |
|                                          | Discontinuous/jerky/augmented latency                                    | 4  |  |
|                                          | Inconstant/eccentric/fragmented (continuous losses of fixation)          | 5  |  |
|                                          | Possible only for small arc                                              | 6  |  |
|                                          | Absent                                                                   | 7  |  |
|                                          | Not testable due to lack of cooperation or a too severe clinical picture | 9  |  |
|                                          | Missing data                                                             | 99 |  |

## Saccades

|                                                                             |                                                                                            |    |  |
|-----------------------------------------------------------------------------|--------------------------------------------------------------------------------------------|----|--|
| No compensatory strategies<br>nor environmental adaptation<br>(LEVEL A)     | Fluid, complete, normal latency, conjugacy and precision, no evident hypo – or hypermetria | 1  |  |
|                                                                             | Fluid, incomplete and/or asymmetric and/or not binocular                                   | 2  |  |
|                                                                             | Slight alteration (hypo-hypermetria, fluidity, latency)                                    | 3  |  |
|                                                                             | Moderate alteration (hypo-hypermetria, fluidity, latency)                                  | 4  |  |
|                                                                             | Severe alteration (hypo-hypermetria, fluidity, latency)                                    | 5  |  |
|                                                                             | Sporadic/difficult to elicit (conditioned by attention)                                    | 6  |  |
|                                                                             | Absent                                                                                     | 7  |  |
|                                                                             | Not testable due to lack of cooperation or a too severe clinical picture                   | 9  |  |
|                                                                             | Missing data                                                                               | 99 |  |
| Compensatory strategies<br>without environmental<br>adaptation<br>(LEVEL B) | Not necessary (already tested in the previous level)                                       | 0  |  |
|                                                                             | Fluid, complete, normal latency, conjugacy and precision, no evident hypo – or hypermetria | 1  |  |
|                                                                             | Fluid, incomplete and/or asymmetric and/or not binocular                                   | 2  |  |
|                                                                             | Slight alteration (hypo-hypermetria, fluidity, latency)                                    | 3  |  |
|                                                                             | Moderate alteration (hypo-hypermetria, fluidity, latency)                                  | 4  |  |
|                                                                             | Severe alteration (hypo-hypermetria, fluidity, latency)                                    | 5  |  |
|                                                                             | Sporadic/difficult to elicit (conditioned by attention)                                    | 6  |  |
|                                                                             | Absent                                                                                     | 7  |  |
|                                                                             | Not testable due to lack of cooperation or a too severe clinical picture                   | 9  |  |
|                                                                             | Missing data                                                                               | 99 |  |
| Minor Environmental<br>Adaptation (LEVEL C)                                 | Not necessary (already tested in the previous level)                                       | 0  |  |
|                                                                             | Fluid, complete, normal latency, conjugacy and precision, no evident hypo – or hypermetria | 1  |  |
|                                                                             | Fluid, incomplete and/or asymmetric and/or not binocular                                   | 2  |  |
|                                                                             | Slight alteration (hypo-hypermetria, fluidity, latency)                                    | 3  |  |
|                                                                             | Moderate alteration (hypo-hypermetria, fluidity, latency)                                  | 4  |  |
|                                                                             | Severe alteration (hypo-hypermetria, fluidity,                                             | 5  |  |



|                                          |                                                                                            |    |  |
|------------------------------------------|--------------------------------------------------------------------------------------------|----|--|
|                                          | latency)                                                                                   |    |  |
|                                          | Sporadic/difficult to elicit (conditioned by attention)                                    | 6  |  |
|                                          | Absent                                                                                     | 7  |  |
|                                          | Not testable due to lack of cooperation or a too severe clinical picture                   | 9  |  |
|                                          | Missing data                                                                               | 99 |  |
| Major Environmental Adaptation (LEVEL D) | Not necessary (already tested in the previous level)                                       | 0  |  |
|                                          | Fluid, complete, normal latency, conjugacy and precision, no evident hypo – or hypermetria | 1  |  |
|                                          | Fluid, incomplete and/or asymmetric and/or not binocular                                   | 2  |  |
|                                          | Slight alteration (hypo-hypermetria, fluidity, latency)                                    | 3  |  |
|                                          | Moderate alteration (hypo-hypermetria, fluidity, latency)                                  | 4  |  |
|                                          | Severe alteration (hypo-hypermetria, fluidity, latency)                                    | 5  |  |
|                                          | Sporadic/difficult to elicit (conditioned by attention)                                    | 6  |  |
|                                          | Absent                                                                                     | 7  |  |
|                                          | Not testable due to lack of cooperation or a too severe clinical picture                   | 9  |  |
|                                          | Missing data                                                                               | 99 |  |

### Saccadic Exploration

|                                                                    |                                                                          |    |  |
|--------------------------------------------------------------------|--------------------------------------------------------------------------|----|--|
| No compensatory strategies nor environmental adaptation (LEVEL A)  | Well organized and systematic                                            | 1  |  |
|                                                                    | Mild alteration of explorative pattern organization                      | 2  |  |
|                                                                    | Moderate alteration of explorative pattern organization                  | 3  |  |
|                                                                    | Severe alteration of explorative pattern organization                    | 4  |  |
|                                                                    | Only possible for near distance and not functional                       | 5  |  |
|                                                                    | Absent                                                                   | 6  |  |
|                                                                    | Not testable due to lack of cooperation or a too severe clinical picture | 9  |  |
|                                                                    | Missing data                                                             | 99 |  |
| Compensatory strategies without environmental adaptation (LEVEL B) | Not necessary (already tested in the previous level)                     | 0  |  |
|                                                                    | Well organized and systematic                                            | 1  |  |
|                                                                    | Mild alteration of explorative pattern organization                      | 2  |  |
|                                                                    | Moderate alteration of explorative pattern organization                  | 3  |  |
|                                                                    | Severe alteration of explorative pattern organization                    | 4  |  |
|                                                                    | Only possible for near distance and not functional                       | 5  |  |
|                                                                    | Absent                                                                   | 6  |  |
|                                                                    | Not testable due to lack of cooperation or a too                         | 9  |  |

|                                                                          |                                                                          |                                                      |   |
|--------------------------------------------------------------------------|--------------------------------------------------------------------------|------------------------------------------------------|---|
|                                                                          | severe clinical picture                                                  |                                                      |   |
|                                                                          | Missing data                                                             | 99                                                   |   |
| Minor Environmental Adaptation (LEVEL C)                                 | Not necessary (already tested in the previous level)                     | 0                                                    |   |
|                                                                          | Well organized and systematic                                            | 1                                                    |   |
|                                                                          | Mild alteration of explorative pattern organization                      | 2                                                    |   |
|                                                                          | Moderate alteration of explorative pattern organization                  | 3                                                    |   |
|                                                                          | Severe alteration of explorative pattern organization                    | 4                                                    |   |
|                                                                          | Only possible for near distance and not functional                       | 5                                                    |   |
|                                                                          | Absent                                                                   | 6                                                    |   |
|                                                                          | Not testable due to lack of cooperation or a too severe clinical picture | 9                                                    |   |
|                                                                          | Missing data                                                             | 99                                                   |   |
|                                                                          | Major Environmental Adaptation (LEVEL D)                                 | Not necessary (already tested in the previous level) | 0 |
| Well organized and systematic                                            |                                                                          | 1                                                    |   |
| Mild alteration of explorative pattern organization                      |                                                                          | 2                                                    |   |
| Moderate alteration of explorative pattern organization                  |                                                                          | 3                                                    |   |
| Severe alteration of explorative pattern organization                    |                                                                          | 4                                                    |   |
| Only possible for near distance and not functional                       |                                                                          | 5                                                    |   |
| Absent                                                                   |                                                                          | 6                                                    |   |
| Not testable due to lack of cooperation or a too severe clinical picture |                                                                          | 9                                                    |   |
| Missing data                                                             |                                                                          | 99                                                   |   |

### Abnormal Ocular Movements

|                                                                                           |    |  |
|-------------------------------------------------------------------------------------------|----|--|
| Absent                                                                                    | 1  |  |
| Inconstant                                                                                | 2  |  |
| Simple nystagmus (one direction), mild                                                    | 3  |  |
| Simple nystagmus (one direction), moderate-severe                                         | 4  |  |
| Multi-directional nystagmus without not conjugated/erratic/deviation associated movements | 5  |  |
| Multi-directional nystagmus with not conjugated/erratic/deviation associated movements    | 6  |  |
| Roving movements                                                                          | 7  |  |
| Not testable due to lack of cooperation or a too severe clinical picture                  | 9  |  |
| Missing data                                                                              | 99 |  |

### Stereopsis

|                                                                          |    |  |
|--------------------------------------------------------------------------|----|--|
| Not testable for age (<6 mo)                                             | 00 |  |
| Present                                                                  | 1  |  |
| Partial                                                                  | 2  |  |
| Absent                                                                   | 3  |  |
| Not testable due to lack of cooperation or a too severe clinical picture | 9  |  |
| Missing data                                                             | 99 |  |
